# Supplementary material
Source: publisher figshare collection journal article supplement (https://acs.figshare.com/ndownloader/files/10969094)
Supplement: Supplementary file 1 [file 10969094]

**Supporting Information**

**Biotransformation of AFFF Component 6:2 Fluorotelomer Thioether Amido Sulfonate**

**Generates 6:2 Fluorotelomer Thioether Carboxylate under Sulfate-Reducing Conditions**

**Authors:** Shan Yi<sup>1</sup>, Katie C. Harding-Marjanovic<sup>2</sup>, Erika F. Houtz<sup>3</sup>, Ying Gao<sup>4</sup>, Jennifer E. Lawrence<sup>1</sup>, Rita V. Nichiporuk<sup>5</sup>, Anthony T. Iavarone<sup>5</sup>, Wei-Qin Zhuang<sup>6</sup>, Martin Hansen<sup>7</sup>, Jennifer A. Field<sup>8</sup>, David L. Sedlak<sup>1</sup>, Lisa Alvarez-Cohen<sup>1,9\*</sup>

**Affiliation:**

<sup>1</sup> Department of Civil and Environmental Engineering, University of California, Berkeley, CA 94720, United States; <sup>2</sup>Exponent, Pasadena, CA 91106, United States; <sup>3</sup>Arcadis, San Francisco, CA 94104, United States; <sup>4</sup>Institute of Desertification Studies, Chinese Academy of Forestry, Beijing 100091, China; <sup>5</sup>The California Institute for Quantitative Biosciences (QB3), University of California, Berkeley, CA 94720, United States; <sup>6</sup>Department of Civil and Environmental Engineering, University of Auckland, Auckland 1142, New Zealand; <sup>7</sup>Department of Environmental Science, Aarhus University, 4000 Roskilde, Denmark; <sup>8</sup>Department of Molecular and Environmental Toxicology, Oregon State University, Corvallis, OR 97331, United States; <sup>9</sup>Earth and Environmental Sciences Division, Lawrence Berkeley National Laboratory, Cyclotron Rd., Berkeley, CA 94720, United States

\* **Correspondent:** Lisa Alvarez-Cohen, Department of Civil and Environmental Engineering, 726 Davis Hall, University of California, Berkeley CA 94720-1710. Phone: (510) 643-5969, Fax: (510) 642-7483, E-mail: [alvarez@ce.berkeley.edu](mailto:alvarez@ce.berkeley.edu)

## Supplemental Materials and Methods

### Chemicals.

Unlabeled and stable isotope-labeled standards for PFCAs and 6:2 fluorotelomer sulfonate (FtS) were purchased from Wellington Laboratories (Guelph, ON, Canada). The AFFF used in this study was manufactured by Ansul with an estimated 2008 manufacture date and obtained from a U.S. military base.(1) The formulation contains predominantly 6:2 FtTAoS at approximately 20 mM and dissolved organic carbon at 11.5 M. Zonyl FSA was obtained from the Field laboratory. Zonyl FSA is a proprietary PFAS mixture containing n:2 (n = 6, 8, 10) fluorotelomer thioether propionate (FtTP) in unknown concentrations. HPLC-grade water and methanol were purchased from Fisher Scientific. All other chemicals and solvents were purchased from either Fisher Scientific or Sigma-Aldrich at the highest possible purity.

### Microcosms.

Pristine solids were collected from the sediment of a creek on the UC Berkeley campus and AFFF-contaminated solids were from a firefighter training area at the Ellsworth Air Force Base (South Dakota). The samples obtained from AFFF-impacted site have no records of the exact makeup of AFFF formulations used onsite, but it is likely that AFFF manufactured by 3M, National Foam, and Ansul accounted for most of the materials used.(2) All microcosms were mixed by gentle swirling to avoid the formation of foams prior to incubation at 30 °C in the dark without shaking. Sodium sulfate (50 mM) and DGBE (1.5 or 3 mM) were periodically amended to ensure that sufficient electron acceptor, electron donor, and carbon source were present in the live microcosms during the incubation period (Table S1). Autoclaved control microcosms were prepared by treating the solids with three autoclave-freeze-thaw cycles to ensure the deactivation of microbial activity.

Active sulfate-reduction was confirmed in the live pristine microcosms when sulfate concentrations decreased and the organic carbon amended was consumed (Figure S2 A, C). In microcosms constructed with contaminated solids, the observed sulfate concentration did not decrease (Figure S2 B, D). One potential explanation for this is that anaerobic microorganisms in the contaminated microcosms used other terminal electron acceptors for their metabolism, such as other sulfur species (sulfite, organosulfonates, and sulfur) that may have resulted from the historical application of AFFFs at the site. Black precipitates, presumably iron sulfides, were observed in the live contaminated microcosms, but not in the autoclaved controls, indicating the presence of sulfate-reducing microbial activity (Figure S2E). The presence of sulfate-reducing bacteria in the contaminated solid microcosms was also confirmed at the end of the experiments using Biological Activity Reaction Tests (BARTs) (Hach, Loveland, Co). A black slime growth at the bottom of the test tube was visualized on the second day in all tubes inoculated with live culture but absent in the control tubes (Figure S2F). The approximate population of sulfate-reducing bacteria estimated in this test was around  $2.5 \times 10^7$  cfu/mL.

### Analytical methods.

A quantification range of 0.1 to 10 µg/L was used for all PFCAs and 6:2 FtS, and 2.3 – 23.4 µg/L for 6:2 FtTAoS.(2) A semi-quantitative method for 6:2 FtTP was developed by applying the TOP assay to Zonyl FSA, the only known commercially available standard reference containing mainly 6:2 and 8:2 FtTP in unknown quantities. The 6:2 FtTP is likely the only 6:2 fluorotelomer compound in the Zonyl FSA. Its molar concentration in the Zonyl FSA

standard was estimated using the TOP assay by summing the molar concentrations of all PFCAs that were expected to be generated from an equivalent concentration of a 6:2 fluorotelomer compound after the application of the assay. (25) The semi-quantitative method of 6:2 FtTP results in a quantification range of 1.3 to 12.7 µg/L. For the other newly identified transformation products, a semi-quantitative analysis was performed. The concentrations of the compounds were determined using the LC-MS/MS instrumental responses relative to an internal standard, isotope-labelled 6:2 FtS, and the calibration curve of the parent compound, 6:2 FtTAoS.

Dissolved organic carbon (DOC) was measured in individual microcosms using a TOC analyzer (TOC-V, Shimadzu, Japan) and sulfate was measured using an ion chromatograph (Dionex ICS 1100, Thermo Fisher, Sunnyvale, CA). (3, 4) Standards of known concentrations ranging from 0.042-4.2 mM (0.5-50 mg C/L) and 0.02 to 2 mM were used to quantify DOC and sulfate, respectively. Dry weight of solids was analyzed in accordance with the standard methods. (5)

TOP assay was used for quantification of total PFASs. Because quantitative standards were not available for many hypothesized biotransformation products, TOP served as a surrogate method for indirectly quantifying these compounds. Briefly, the stored 100 µL sample-methanol mixtures were flushed with nitrogen gas until dry. The dried samples were then reconstituted in a seven mL solution containing 116 mM sodium hydroxide and 51 mM potassium persulfate and incubated for 12 hours at 85 °C (water bath). The reacted solutions were then diluted and analyzed for total PFCA concentrations using LC-MS/MS. The resulting total molar concentrations of combined PFCAs represented the total molar concentration of PFASs in the samples.

The activity of sulfate-reducing bacteria in the contaminated solid microcosms was confirmed at the end of the experiments using BARTs (Hach, Loveland, CO) following the manufacturer's instructions. Briefly, pooled slurries from the triplicate live microcosms were diluted 10 or 50 folds with sterile reduced mineral salt medium to minimize the interference of the black precipitates. Duplicates of 15 mL of diluted culture were added to the test vials and incubated at room temperature in an anaerobic chamber (Coy Laboratory Products, Grass Lake, MI) with a nitrogen and hydrogen (2-3%) atmosphere ( $O_2 < 2$  ppm). Duplicate test vials with autoclaved live culture at the same dilutions were used as negative controls. One vial for each 10- or 50-fold diluted autoclaved microcosms was also included in the test for comparison.

### **Statistical analysis.**

Statistical significance for concentration changes between Day 0 and the end of experiments were tested using a student t test. P values less than 0.05 were considered statistically different for the two groups compared. (6)

### **Prediction library establishment.**

The predicted biotransformation products of 6:2 FtTAoS were generated by the EAWAG-BBD Pathway Prediction System (EAWAG-BBD-PPS, <http://eawag-bbd.ethz.ch/predict/>, updated May 2016) using the reaction rules that take place under either aerobic or anaerobic conditions. One limitation related to the EAWAG-BBD-PPS is that this database cannot accurately predict transformation products of highly fluorinated compounds containing carbons that are bonded with more fluorines than non-fluorine atoms. (7) For example, the EAWAG-BBD-PPS prediction stops at the formation of PFHpA for 6:2 FtTAoS without taking into account the recently reported oxidation pathways that can lead to the partial

defluorination reactions that form products such as 6:2 FtUCA, 5:3 FtCA, PFPeA and PFBA. In order to obtain a more comprehensive and up-to-date library, we compensated for this limitation by including perfluoroalkyl sulfonates and carboxylates and polyfluorinated biotransformation products of 6:2 FtS and 6:2 fluorotelomer alcohol (FtOH) and 6:2 FtTAoS (aerobic pathways) compiled from the experimental observations of recent studies.(3, 8-14)

#### **Verification of the automated suspect screening of HR-ESI-MS data.**

The automated suspect screening process was examined using triplicate solutions containing 32 PFAS standard compounds, including 18 perfluoroalkyl carboxylates and sulfonates with carbon chain lengths ranging from four to 18, 11 fluorotelomers and three perfluorosulfonamides (Table S4). The concentration of each of the 32 standard compounds in the solution was around 17 µg/L, which accounted for approximately 0.6-3% (mol) mass of initially amended 6:2 FtTAoS concentration used in the HR-ESI-MS analysis. A blank control consisting of only water and methanol was included along with the triplicate solutions during SPE treatments and mass spectrometry analysis to remove background ions before matching the measured ion accurate masses ( $m/z$ ) to the library masses during the verification experiments.

Two libraries of PFASs were used to assess the efficacy and accuracy of the suspect screening method for positive and false positive and negative identifications. The library consisted of all 32 standard compounds, referred as the "standard library". The other library was the prediction library as described above. Less than five ppm mass deviation between measured and library masses indicated a positive identification. False positives were defined as masses that were not included in the 32 listed standard compounds, but were recognized by the analysis using the prediction library. False negatives were defined as compounds that were present in the mass spectra of 32 PFAS solution but failed to match either library by the automated screening. Our tests indicate that 31 of the 32 standard compounds at the tested concentrations can be detected by HR-ESI-MS and identified by our automated analysis. Most of these 31 compounds were detected in all three replicated mixed solutions, except for four compounds, namely, PFBA, PFPeA, 8:2FtCA, and 8:2 Zonyl FSA, which were only found in two of the triplicated mixtures. Since these compounds could be quantitatively analyzed by LC-MS/MS, the inability to detect them using HR-ESI-MS did not affect our analysis. The analysis using the prediction library of 78 compounds showed only one false positive ( $m/z$  468.9791). These analyses indicated the effectiveness of our automated matching method with HR-ESI-MS data.

#### **Mass spectrometry analysis and workflow for identifying transformation products.**

For suspect screening, we developed a Python script (version 2.7) to perform an automated analysis (Figure S1). Briefly, the mass spectra were first filtered with a mass-defect analysis in order to focus on masses that are potential PFASs.(1) A band ranging from -0.15 to 0.15 Da was used as the mass defect filter as previously reported.(15) The coverage efficiency of this filter was tested against the potential transformation products (predicted from EAWAG-BBD-PPS) of which all mass defect values were found in the range. Matching between measured and suspect library masses was performed on all samples and controls (Figure S1).

#### **HR-ESI-MS and HR-naoESI-MS/MS for identifying transformation products.**

Accurate mass data were obtained at QB3/Mass spectrometry Facility at the University of California, Berkeley. Samples were analyzed on Finnigan LTQ FT mass spectrometer (Thermo Fischer Scientific) equipped with electrospray ionization (ESI) source in negative ion mode in

the  $m/z$  range 100-1000. Samples were dissolved in methanol (0.1% ammonium hydroxide, v/v) with a final concentration of 1-3  $\mu$ M and were directly infused via syringe pump at the rate 5  $\mu$ L/min. Xcalibur™ software (version 2.0.7, Thermo) was used for both data acquisition and data analysis. For suspect screening, we used an in-house automated analysis to match accurate mass measurements to a list of exact masses of potential biotransformation products (Figure S1). The masses that had no match in the prediction library were selected for the non-targeted analysis only when they were present in higher relative abundance in live cultures than in the controls and with a relative ion abundance greater than 1% (relative to the most abundant ion; Figure S1). The molecular formula fit was manually performed using Xcalibur™ software.

Compound identification was considered tentatively positive when (1) the error of the HR-ESI-MS accurate mass to the exact mass of potential transformation product was no more than 5 ppm; and (2) significant differences in HR-ESI-MS ion abundance between live and control microcosms were observed.

The majority of fragment ions of proposed structures were analyzed using High-resolution (HR) nanoESI MS/MS (HR-nanoESI-MS/MS) in the negative ion mode (Synapt G2-Si, Waters, Milford, MA) over the  $m/z$  range of 50-1000. (Figure S3). The in-silico fragmentation interpretation was performed with the software, ACD/MS fragmenter 2015 (Advanced Chemical Development, Toronto, ON, Canada), with a setting that considered all possible fragmentation reactions. The structures of fragment ions were proposed using ACD/MS fragmenter software with mass errors less than 5 mDa or 15 ppm between the observed accurate mass and the theoretical exact mass of proposed fragments.(15) Since the structure of 6:2 FtTP was confirmed by the standard reference, Zonyl FSA, its fragmentation spectrum was used as a reference for other proposed structures that shared similar structure moiety with 6:2 FtTP.

186 **Supplemental Figures and Tables**

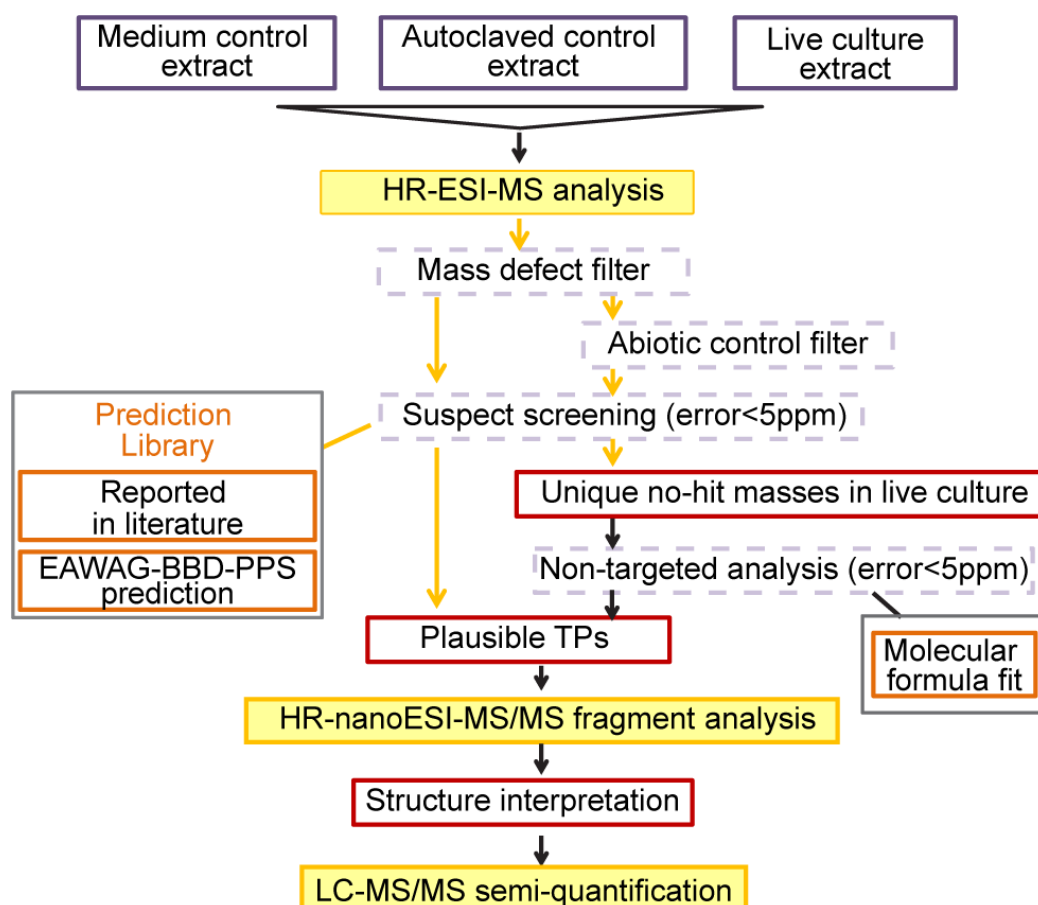

187 **Figure S1.** Workflow that utilizes automated suspect screening in conjunction with manual non-  
 188 targeted analysis to identify novel biotransformation products in AFFF-amended microcosms. A  
 189 library of predicted biotransformation products was established with previously reported PFASs  
 190 and predicted products of 6:2 FtTAoS from EAWAG-BBD-PPS. Automated suspect screening  
 191 of HR-ESI-MS data was performed using this library on all live and control microcosm samples.  
 192 The masses that were not matched during the suspect screening then underwent a non-targeted  
 193 analysis that compares the full-scan HR-ESI-MS data among samples to focus on the candidate  
 194 masses either uniquely associated with live microcosms or present at higher abundance in live  
 195 microcosms than controls for determining the molecular formulae. All plausible products were  
 196 then analyzed for proposed structures using HR-nanoESI-MS/MS and quantified (or semi-  
 197 quantified) using LC-MS/MS. Yellow arrows indicate the automated screening that was  
 198 performed using a Python script (version 2.7). Black arrows indicate manual analyses. “TPs”  
 199 stands for transformation products.  
 200  
 201  
 202

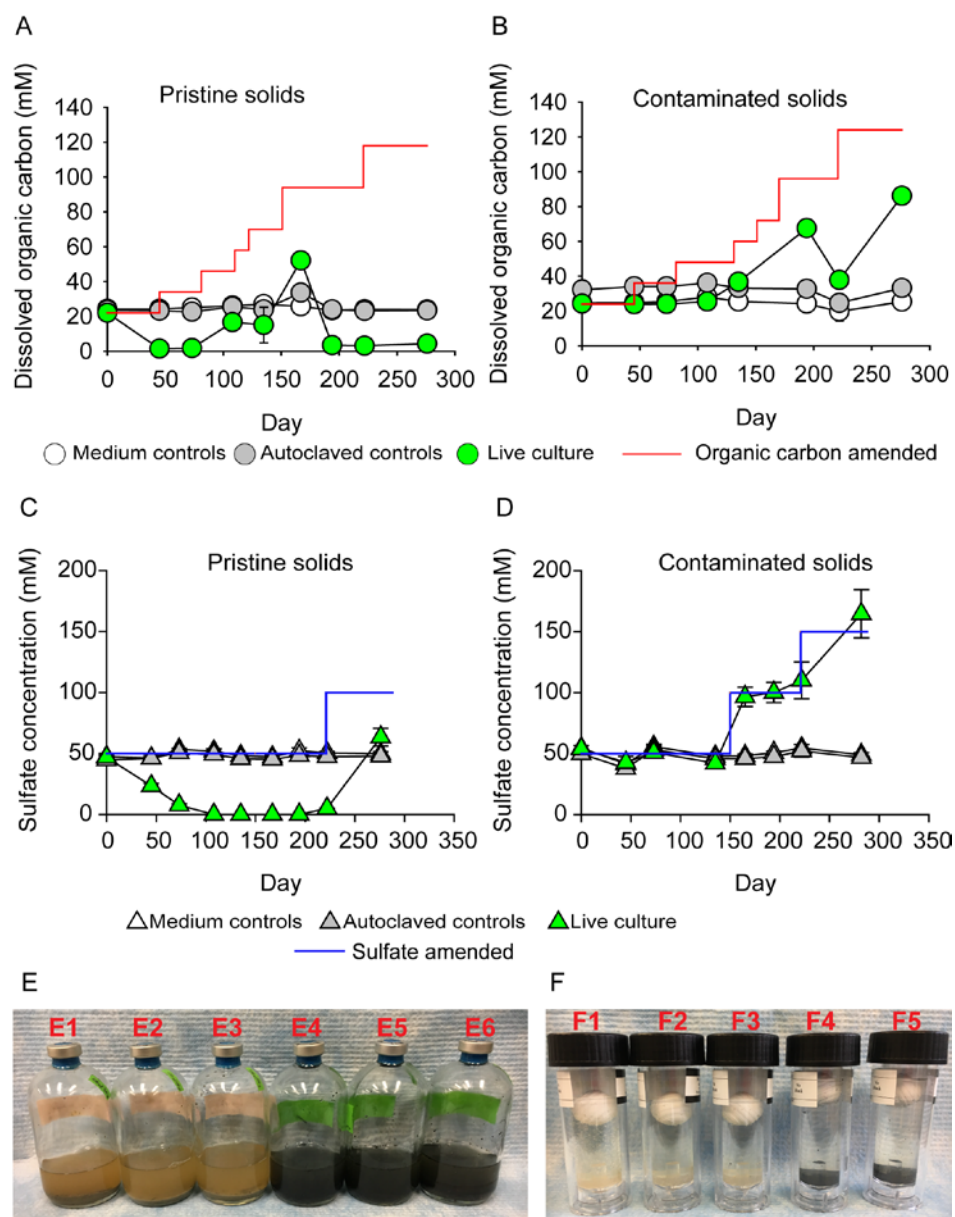

**Figure S2.** Dissolved organic carbon concentrations and sulfate concentrations in pristine (A, C) or contaminated (B, D) microcosms. The red and blue lines represent the total amended organic carbon and sulfate concentrations that were calculated from amended concentrations, respectively (Table S1). Error bars represent the standard deviation of averages from triplicate microcosms. The autoclaved (E1-3) and live (E4-6) microcosms that were inoculated with contaminated solids (E). The Biological Activity Reaction Tests (BARTs; Hach, Loveland, CO) for sulfate-reducing bacteria (F). F1, autoclaved microcosms (50× dilution); F2-3, autoclaved live microcosms (50× dilution); F4-5, live microcosms (50× dilution).

A

 $m/z$  451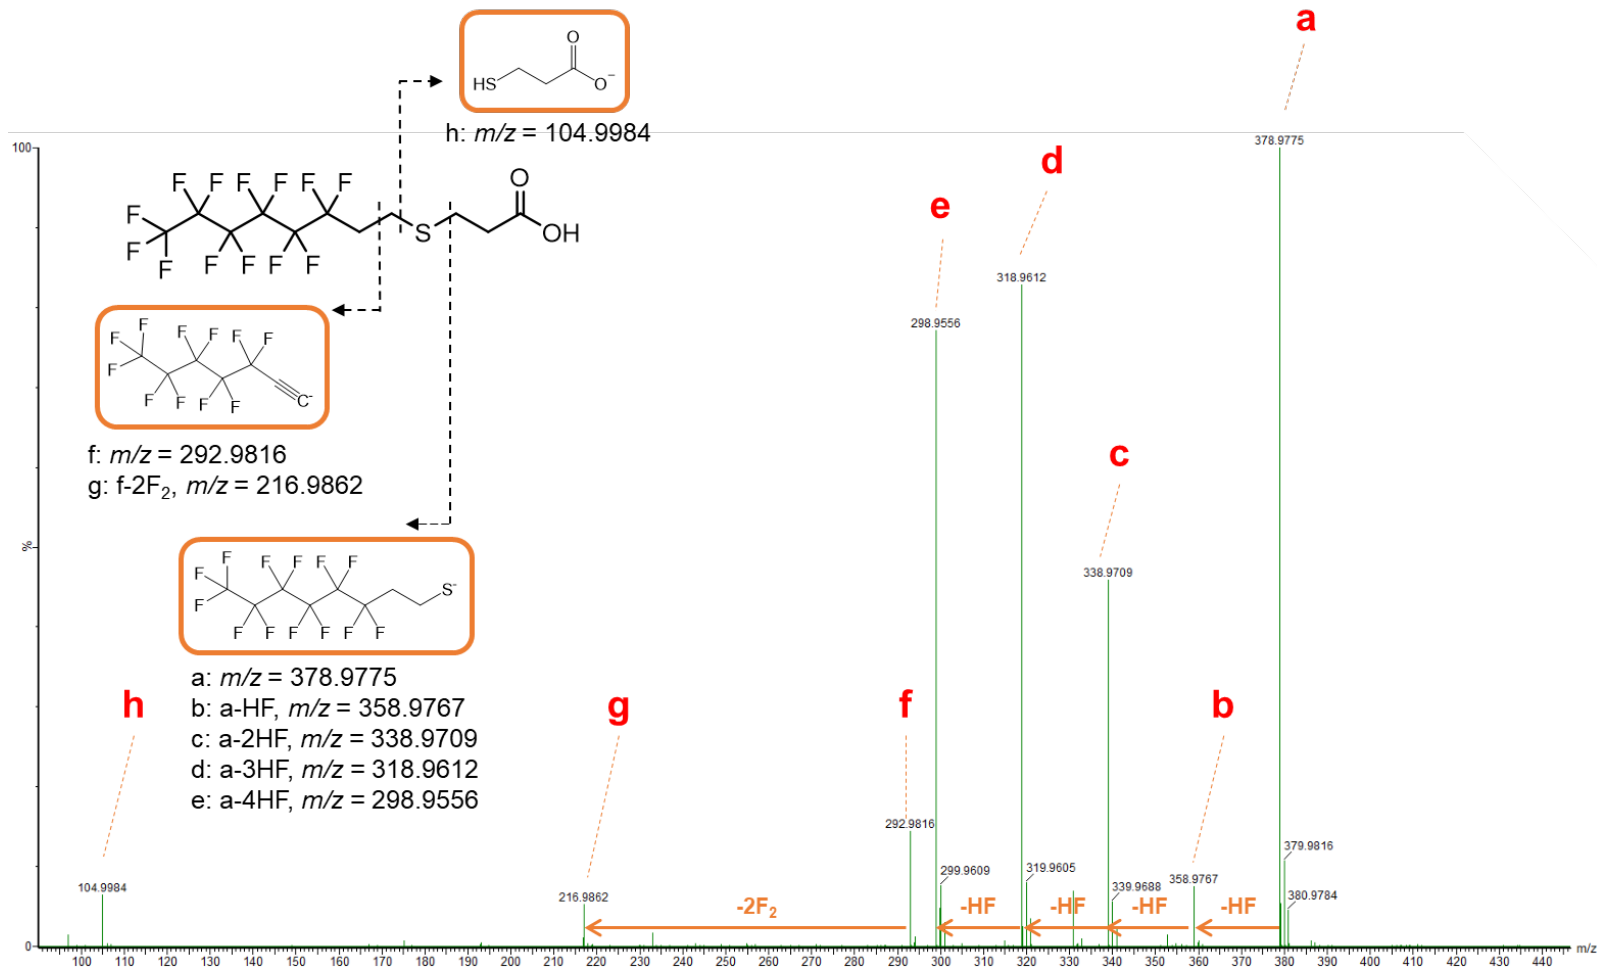

218

219  
220



B

 $m/z$  522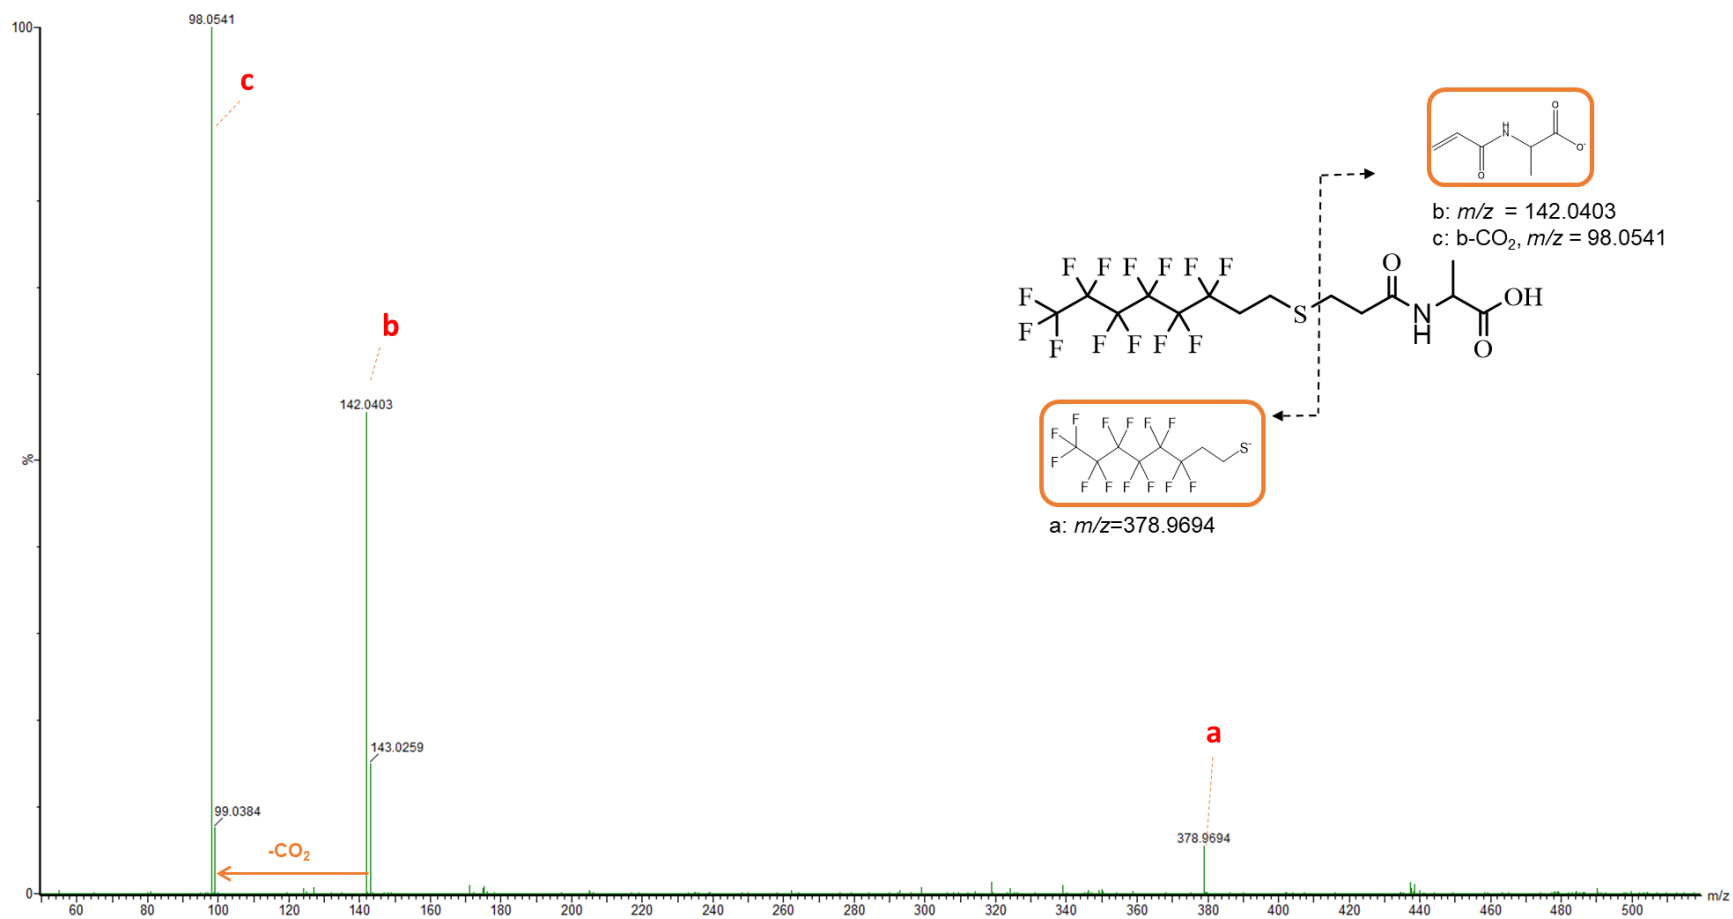

*m/z* 523

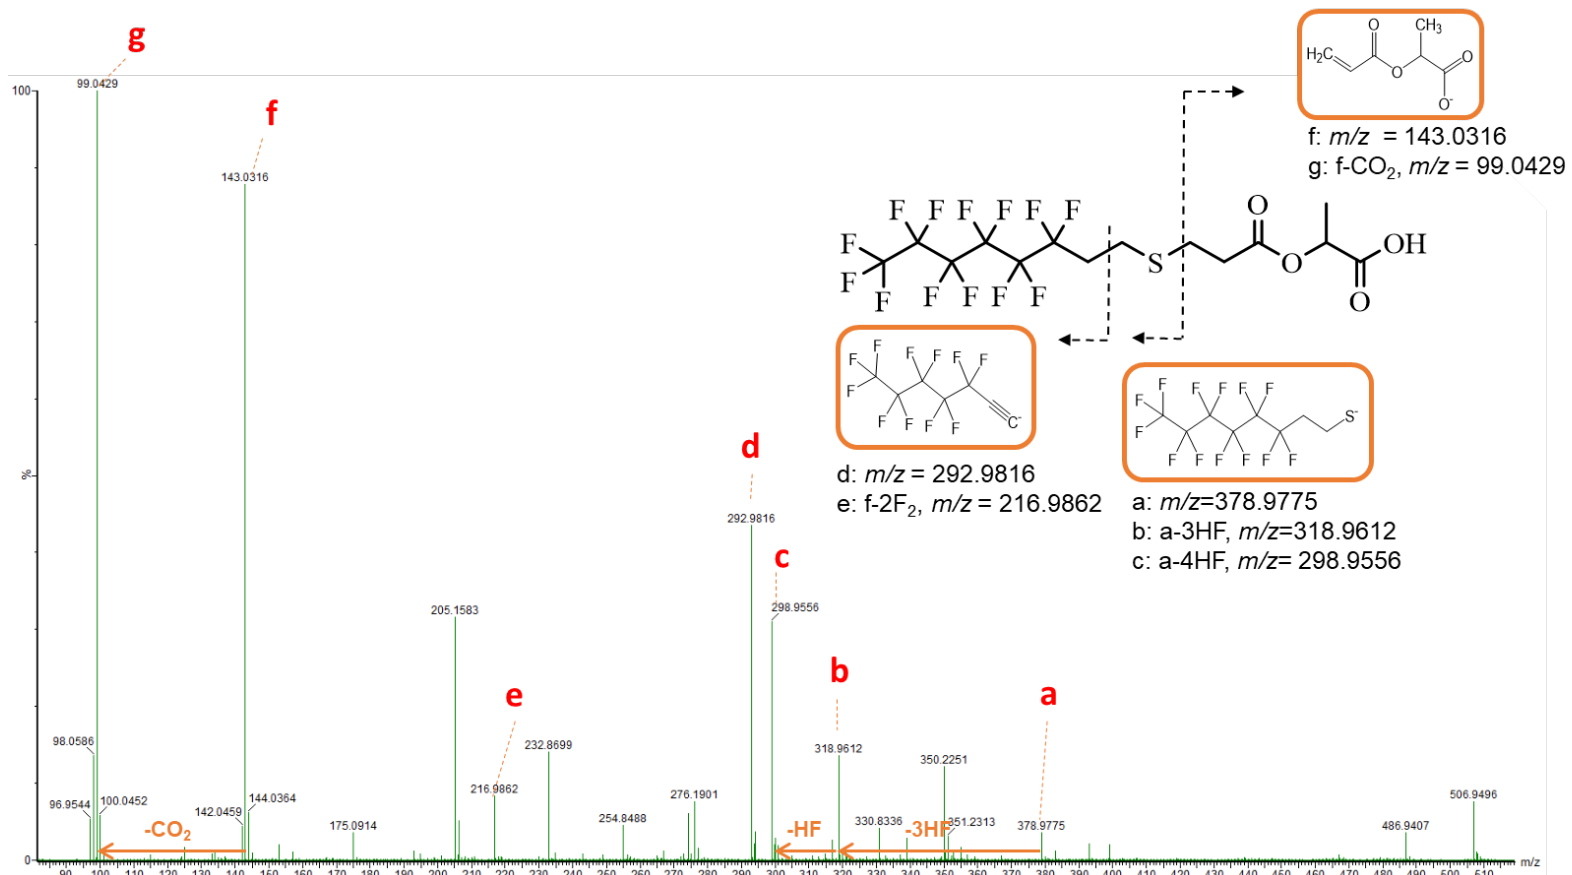

228  
229  
230  
231

*m/z* 593

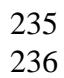

E

 $m/z$  602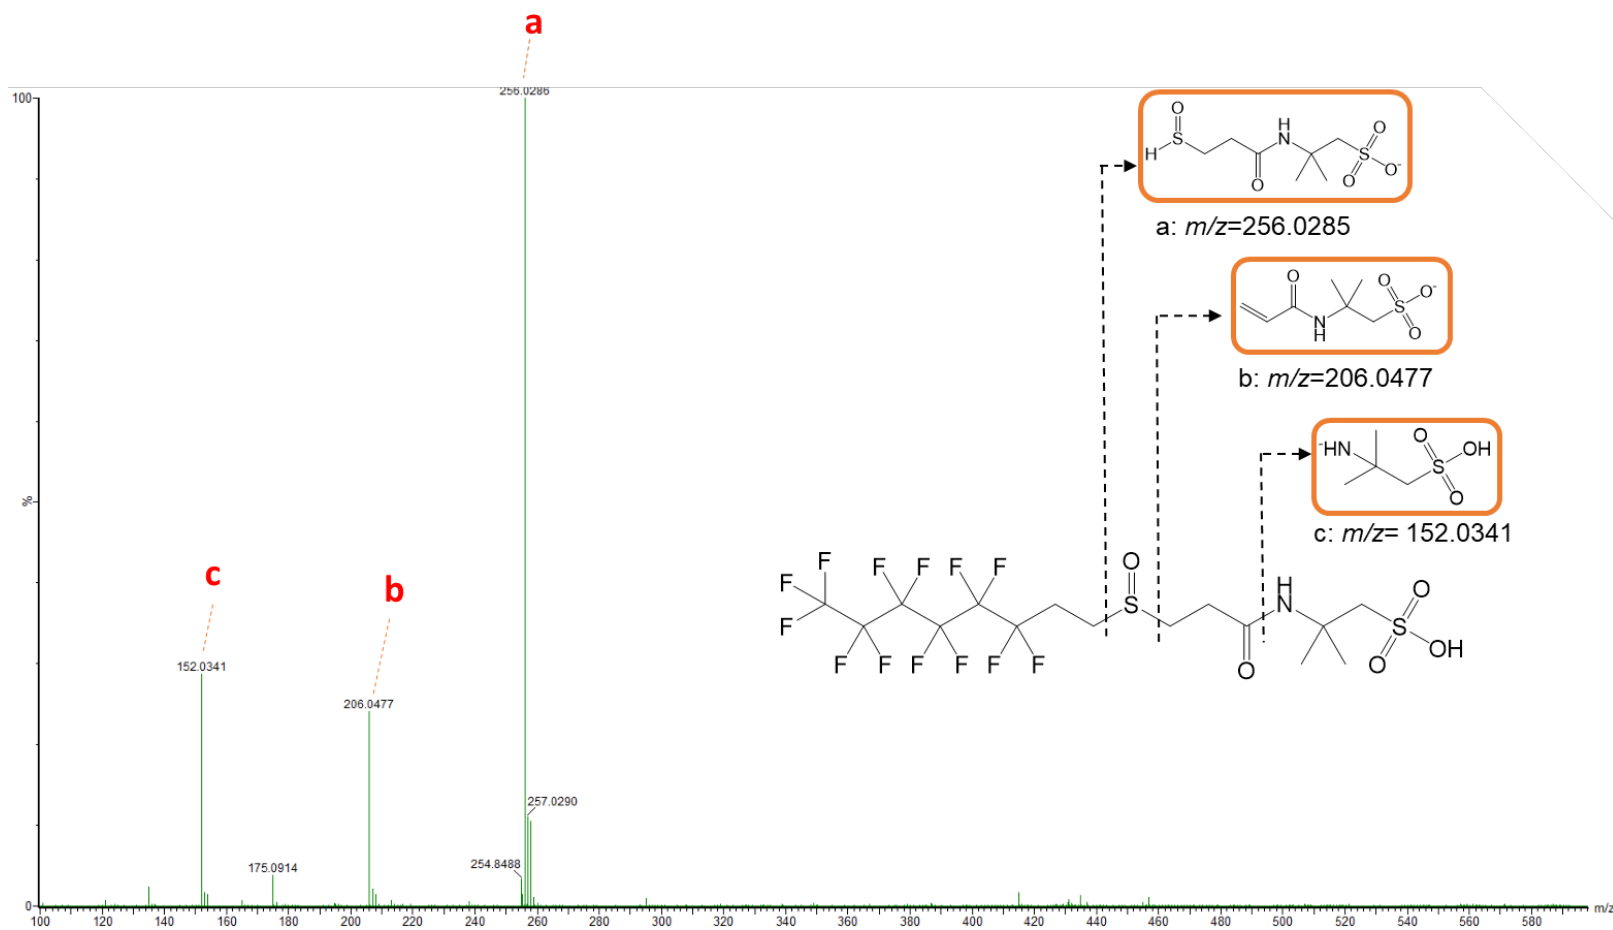

F

 $m/z$  467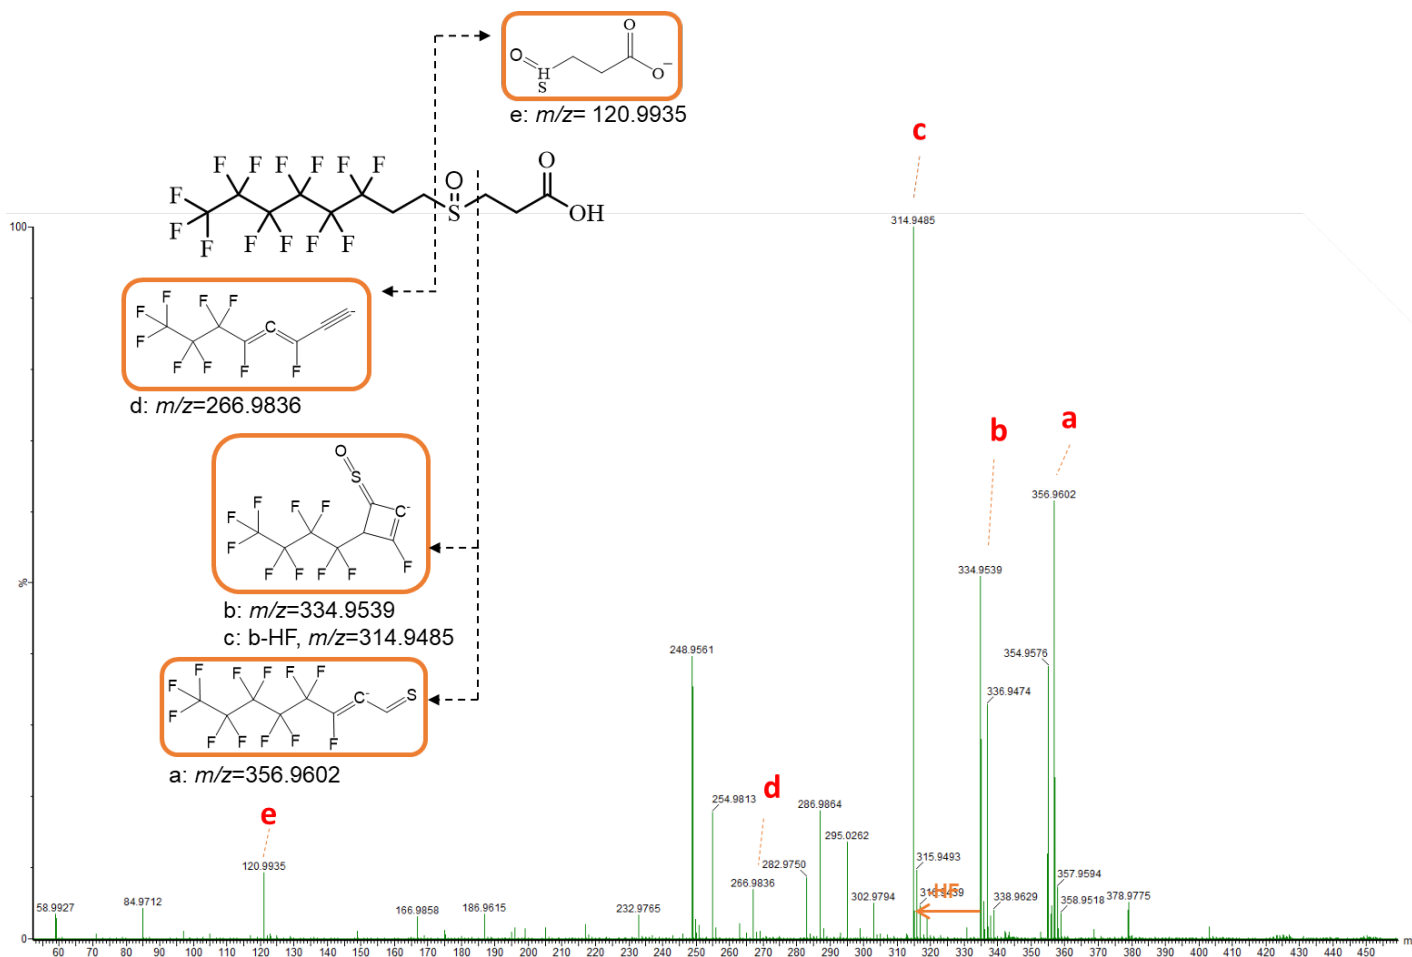

245

**Figure S3.** High resolution nanoESI MS/MS spectra and *in silico* fragment interpretation. The structure shown was proposed by the software, ACD/MS fragmenter 2015 (Advanced Chemical Development, Toronto, ON, Canada) with mass errors less than 5 mDa or 15 ppm relative to the theoretical exact mass of proposed fragments. Exact mass and error of proposed fragments is shown in Table S5. A,  $m/z$  415; B,  $m/z$  522; C,  $m/z$  523; D,  $m/z$  593; E,  $m/z$  602; F,  $m/z$  467.

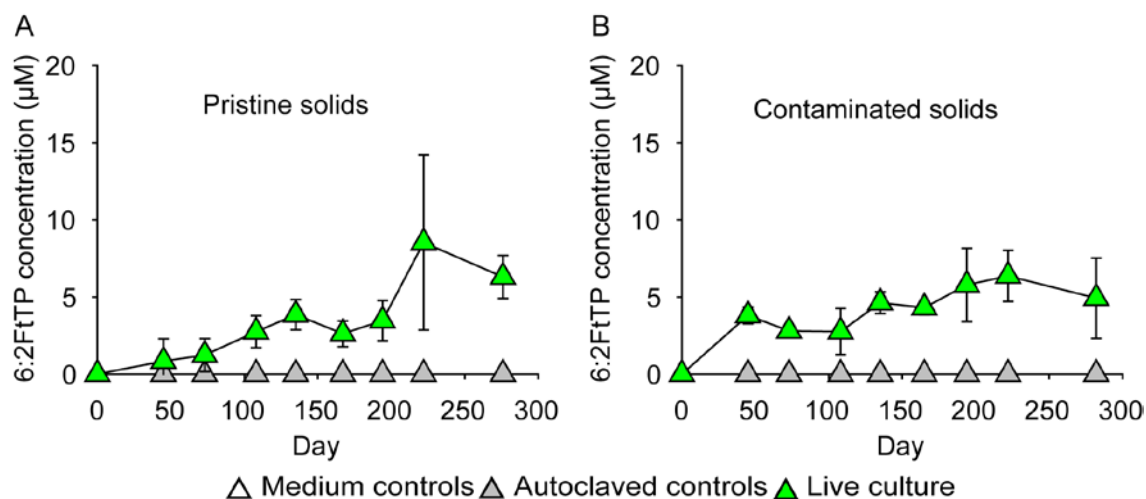

**Figure S4.** Production of 6:2 FtTP ( $m/z$  451) during 6:2 FtTAoS biotransformation was confirmed and semi-quantified using a commercially available standard reference, Zonyl FSA. Error bars represent the standard deviation of averages from triplicate microcosms. A, pristine solids; B, contaminated solids.

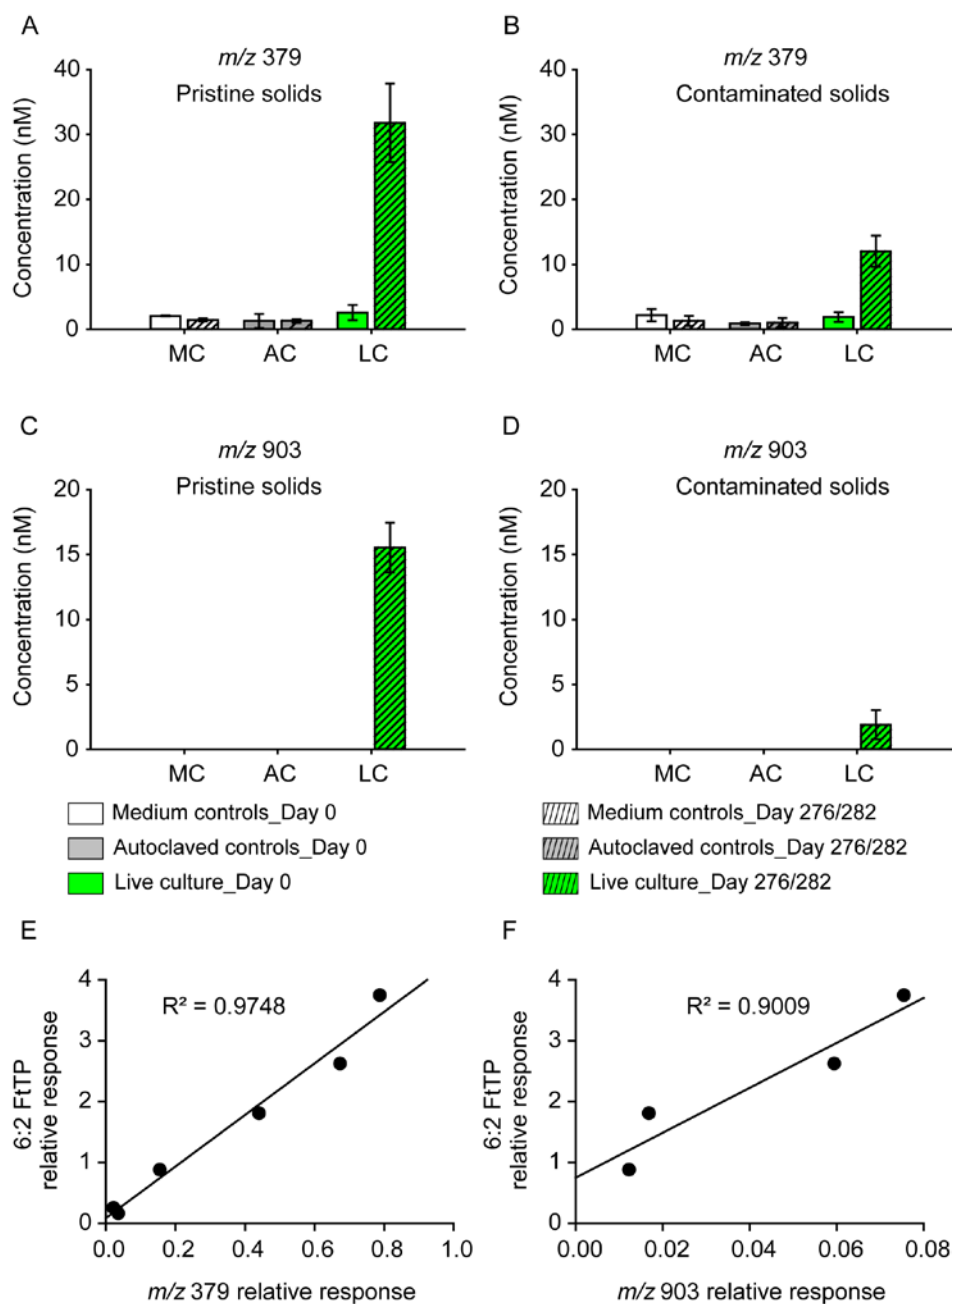

**Figure S5.** Semi-quantification of *m/z* 379 (A, B) and 903 (C, D) based on the estimation of molar response using the calibration of the parent compound, 6:2 FtTAoS. MC, AC, and LC stand for medium controls, autoclaved controls and live culture, respectively. Error bars show the standard deviation of the average value obtained from triplicate microcosms. The correlation of instrumental relative responses of 6:2 FtTP and *m/z* 379 (E) or *m/z* 903 (F) in the standard solutions of Zonyl FSA.

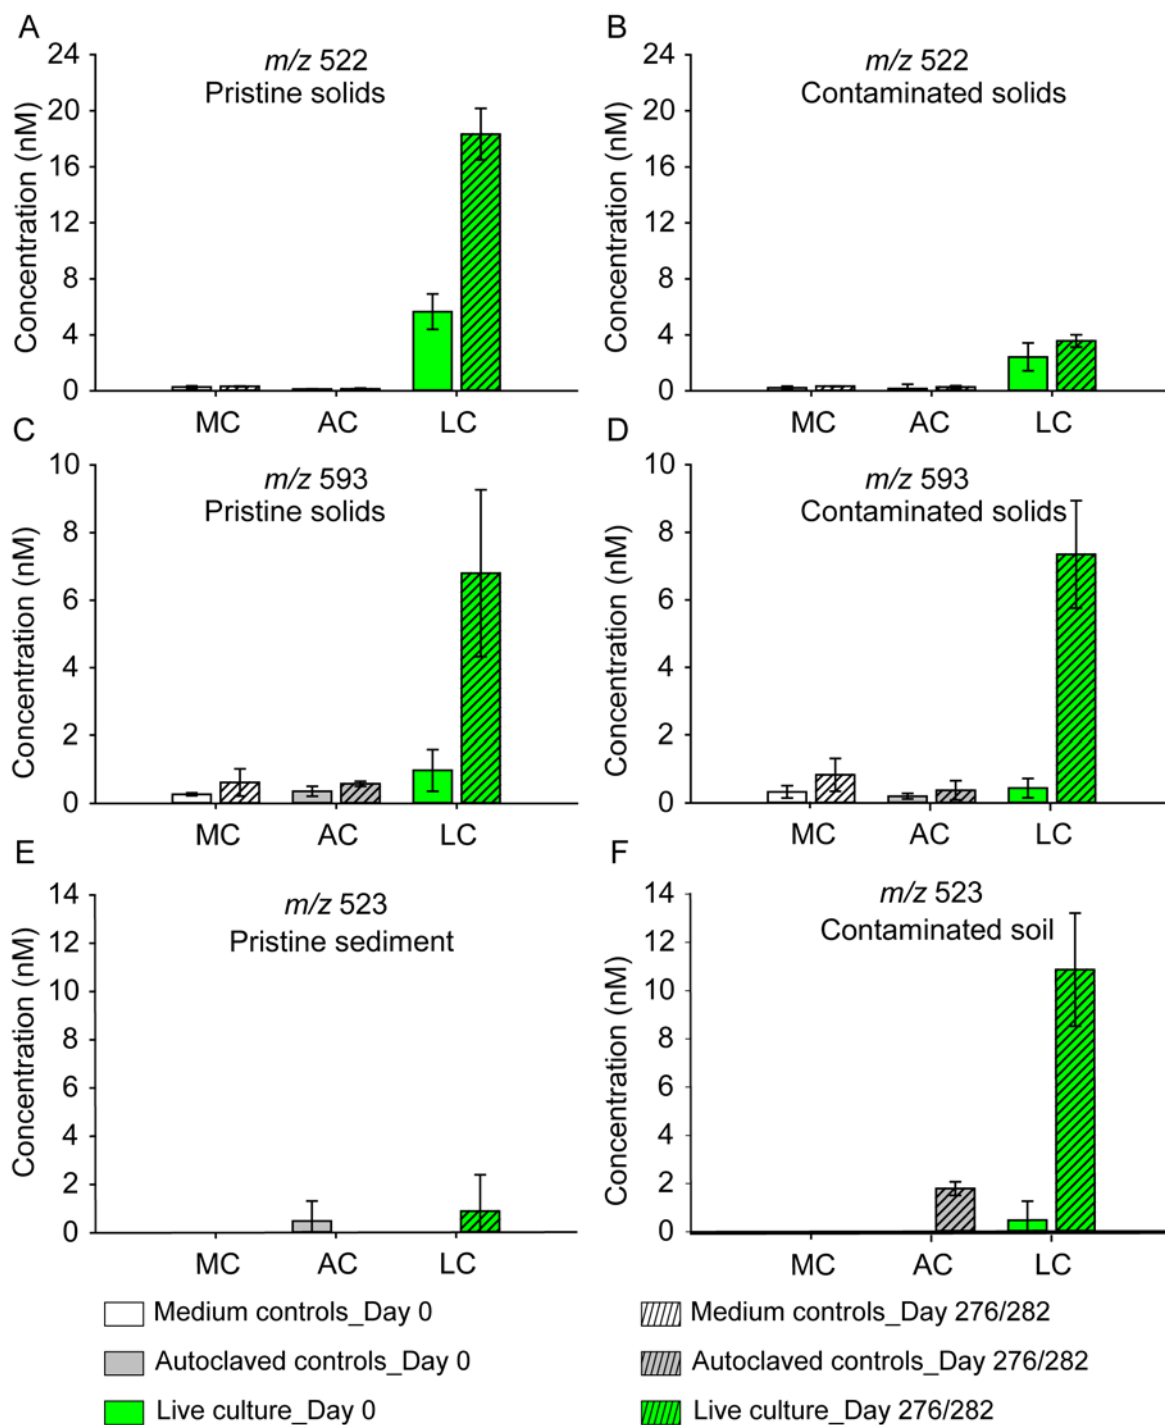

**Figure S6.** Concentrations of newly identified transformation products at Day 0 and at the end of experiments. These intermediates were semi-quantified based on the estimation of molar response using the calibration of the parent compound, 6:2 FtTAoS. MC, AC, and LC stand for medium control, autoclaved control and live culture, respectively. Error bars show the standard deviation of the averages from biological triplicates. *m/z* 522, A, B; *m/z* 593, C, D; *m/z* 523, E, F.



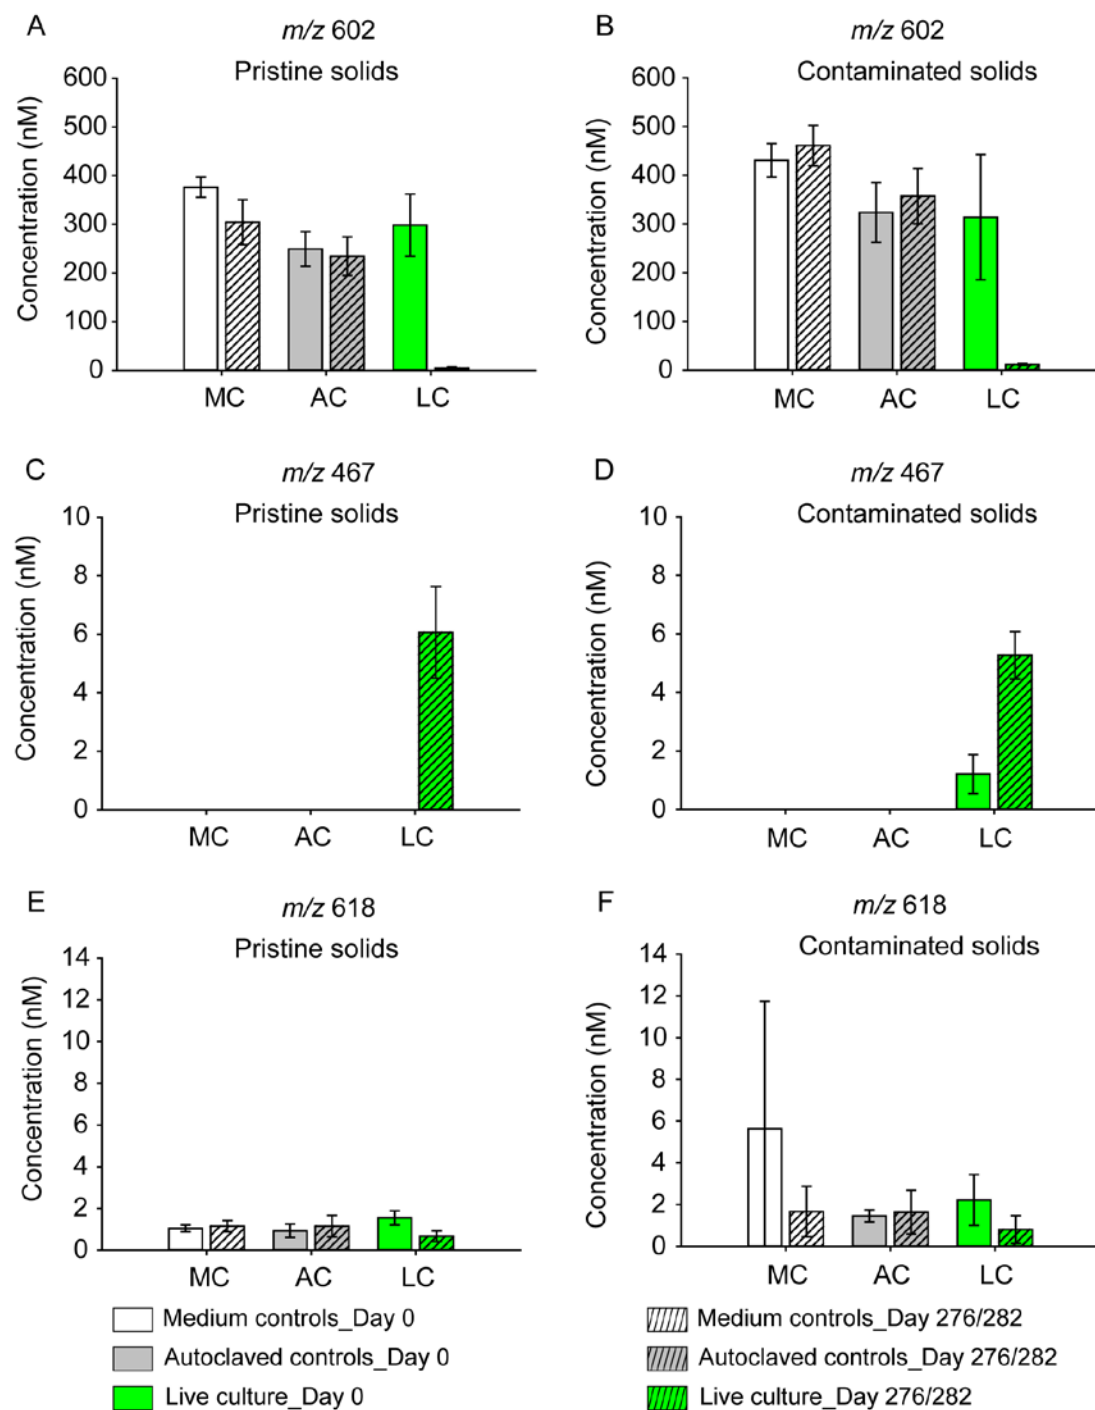

**Figure S7.** Semi-quantification of  $m/z$  602 (A, B), 467 (C, D) and 618 (E, F) at Day 0 and at the end of experiments based on the estimation of molar response using the calibration of the parent compound, 6:2 FtTAoS. MC, AC, and LC stand for medium controls, autoclaved controls and live culture, respectively. Error bars show the standard deviation of the average value obtained from triplicate microcosms.

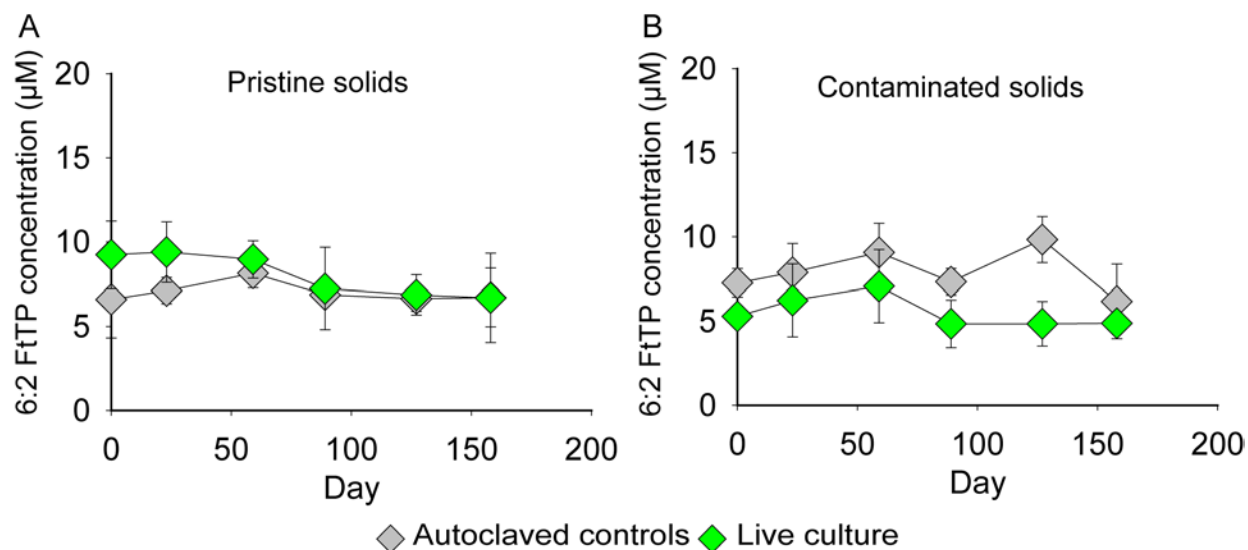

**Figure S8.** Concentrations of 6:2 FtTP in autoclaved and live microcosms amended with Zonyl FSA. Error bars show the standard deviation of averages of triplicate microcosms. A, pristine solids; B, contaminated solids.

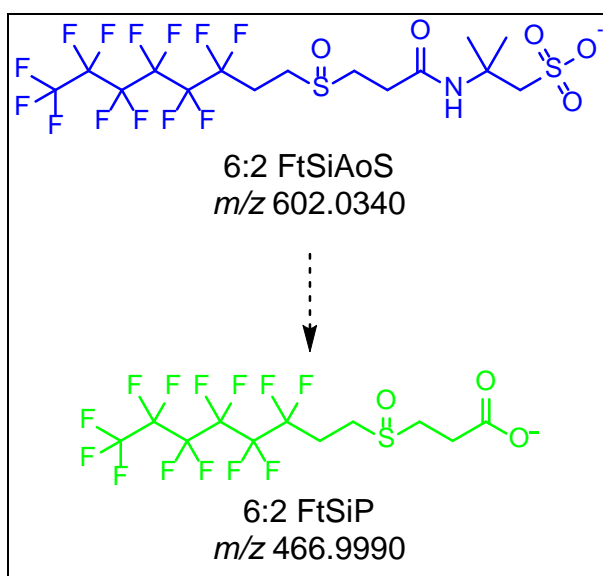

**Figure S9.** Hydrolysis reaction that was possibly responsible for the removal of 6:2 FtSiAoS and the generation of 6:2 FtSiP. Level of confidence in the structures identified using high-resolution mass spectrometry: blue, possible structures (Level 2); green, tentative candidates (Level 3).(16)

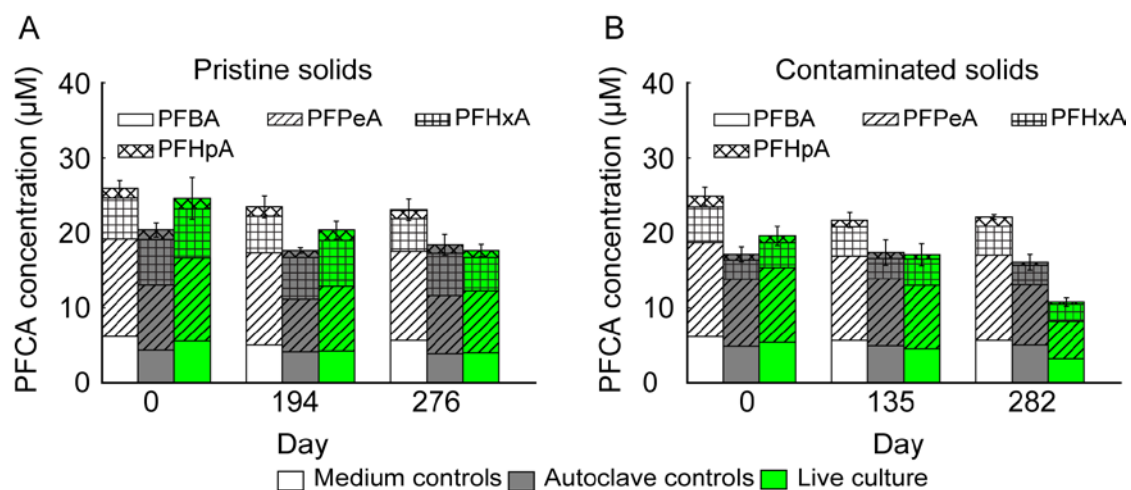

**Figure S10.** Total oxidative precursor (TOP) assay of microcosms constructed with pristine solids (A) or contaminated solids (B). Error bars show the standard deviation of the average value obtained from biological triplicates. PFCA, perfluoroalkyl carboxylate; The structures of PFBA, PFPeA, PFHxA, and PFHpA are displayed in Table S2.

300 **Table S1.** Microcosms setup conditions. (\*Conditions are the same in all live and control microcosms.)

| Conditions         | Replicates | Inoculum                          | Medium                                                                 | Carbon source &<br>electron donor* | Electron<br>acceptor*†                     | AFFF* | Initial |  |  |  |  |  |
|--------------------|------------|-----------------------------------|------------------------------------------------------------------------|------------------------------------|--------------------------------------------|-------|---------|--|--|--|--|--|
|                    |            |                                   | composition<br>(50 ml)*                                                |                                    |                                            |       | DGBE*†  |  |  |  |  |  |
| Pristine           |            |                                   |                                                                        |                                    |                                            |       |         |  |  |  |  |  |
| Medium Control     | 3          | Nil                               | Mineral salt medium<br><br>+ Cysteine sulfide +<br>resazurin indicator | AFFF organics +DGBE                | Na <sub>2</sub> SO <sub>4</sub><br>(50 mM) | 50 µl | 1.5 mM  |  |  |  |  |  |
| Autoclaved Control | 3          | Autoclaved pristine<br>solids     |                                                                        |                                    |                                            |       |         |  |  |  |  |  |
| Live Culture       | 3          | Live pristine solids              |                                                                        |                                    |                                            |       |         |  |  |  |  |  |
| Contaminated       |            |                                   |                                                                        |                                    |                                            |       |         |  |  |  |  |  |
| Medium Control     | 3          | Nil                               |                                                                        |                                    |                                            |       |         |  |  |  |  |  |
| Autoclaved Control | 3          | Autoclaved<br>contaminated solids |                                                                        |                                    |                                            |       |         |  |  |  |  |  |
| Live Culture       | 3          | Live contaminated<br>solids       |                                                                        |                                    |                                            |       |         |  |  |  |  |  |

301 †1.5 (or 3 mM) DGBE was provided on days 46, 82, 111, 123, 151 (3 mM), and 222 (3 mM) in pristine microcosms and on days 46, 82, 132, 151, 171 (3 mM)  
302 and 222 (3 mM) in contaminated microcosms. 50 mM Na<sub>2</sub>SO<sub>4</sub> was amended on days 151 (for contaminated microcosms) and 222 (for both pristine and  
303 contaminated microcosms).

| Acronym | Structure                                                                           | Name used in this study (previously reported names (Reference))* |
|---------|-------------------------------------------------------------------------------------|------------------------------------------------------------------|
| PFBA    | 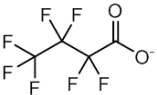   | Perfluorobutanoate                                               |
| PFPeA   |    | Perfluoropentanoate                                              |
| PFHxA   |    | Perfluorohexanoate                                               |
| PFHpA   |    | Perfluoroheptanoate                                              |
| PFOA    |  | Perfluorooctanoate                                               |
| PFNA    |  | Perfluoronanoate                                                 |
| PFDA    |  | Perfluorodecanoate                                               |
| PFUdA   |  | Perfluoroundecanoate                                             |
| PFDoA   |  | Perfluorododecanoate                                             |
| 6:2 FtS |  | 6:2 Fluorotelomer sulfonate                                      |

|                        |                                                                                     |                                                                                                                                                                                                  |
|------------------------|-------------------------------------------------------------------------------------|--------------------------------------------------------------------------------------------------------------------------------------------------------------------------------------------------|
| 6:2 FtTAoS             | 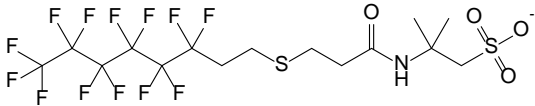   | 6:2 <u>F</u> luorot <u>e</u> lomer thioether <u>a</u> mido<br>sulfonate<br>(n:2 tridecaFluoroAlkylThia<br>PropanoAmido-MethylPropylSulfonate,<br>n:2 Fluorotelomer Thio<br>Amido Sulfonate (15)) |
| 6:2 FtTP               |    | 6:2 <u>F</u> luorot <u>e</u> lomer thioether <u>p</u> ropionate<br>(n:2 heptadecaFluoroDecylThia Propanic<br>acid (15))                                                                          |
| 6:2 FtTPIA             |    | 6:2 <u>F</u> luorot <u>e</u> lomer thioether <u>p</u> ropanoyl<br><u>a</u> lanine                                                                                                                |
| 6:2 FtTPoP             |    | 6:2 <u>F</u> luorot <u>e</u> lomer thioether <u>p</u> ropanoyl<br><u>o</u> xy <u>p</u> ropanoate (6:2 FtTPoP)                                                                                    |
| 6:2 FtTPIAA            |    | 6:2 <u>F</u> luorot <u>e</u> lomer thioether <u>p</u> ropanoyl<br><u>a</u> lanyl <u>a</u> laninate                                                                                               |
| 6:2 FtSiP <sup>3</sup> |   | 6:2 <u>F</u> luorot <u>e</u> lomer <u>s</u> ulfinyl <u>p</u> ropanoate                                                                                                                           |
| 6:2 FtSiAoS            |  | 6:2 <u>F</u> luorot <u>e</u> lomer <u>s</u> ulfinyl <u>a</u> mido<br>sulfonate                                                                                                                   |
| 6:2 FtSoAoS            |  | 6:2 <u>F</u> luorot <u>e</u> lomer <u>s</u> ulfonyl <u>a</u> mido<br>sulfonate<br>(n:2 tridecaFluoroAlkyl Sulfonyl(SO2)<br>PropanoAmido-MethylPropylSulfonate<br>(15))                           |

\* The naming strategy and acronyms of the newly identified transformation products were adapted from literature precedents of the fluorotelomer compounds. The newly identified transformation products were named using a n:2 format to represent the backbone of perfluorinated and unsubstituted carbon numbers. Additional groups were named starting from the immediate end adjacent to the backbone carbon chain. Since all the transformation products were formed in the physiological conditions (e.g., neutral pH), the ionic forms instead of acid forms were used in the names.

312 **Table S3.** Quadrupole LC-MS/MS methods for novel biotransformation products identified in this study.

| Name                             | Internal<br>standard       | Molecular<br>ion ( <i>m/z</i> ) | Quantifier<br>ion ( <i>m/z</i> ) | Qualifier ion<br>( <i>m/z</i> ) | Fragmentor<br>voltage (V) | Collision<br>energy (V) | Polarity | Standard<br>reference |
|----------------------------------|----------------------------|---------------------------------|----------------------------------|---------------------------------|---------------------------|-------------------------|----------|-----------------------|
| 6:2 FtTP<br>( <i>m/z</i> 451)    | [ <sup>13</sup> C2]6:2 FtS | 451                             | 379                              | 105                             | 60                        | 10                      | negative | Zonyl FSA             |
| 6:2 FtSiP<br>( <i>m/z</i> 467)   | [ <sup>13</sup> C2]6:2 FtS | 467                             | 315                              | 59                              | 60                        | 20                      | negative | 6:2 FtTAoS            |
| 6:2 FtTPIA<br>( <i>m/z</i> 522)  | [ <sup>13</sup> C2]6:2 FtS | 522                             | 142                              | 98                              | 90                        | 10                      | negative | 6:2 FtTAoS            |
| 6:2 FtTPoP<br>( <i>m/z</i> 523)  | [ <sup>13</sup> C2]6:2 FtS | 523                             | 357                              | 144                             | 135                       | 30                      | negative | 6:2 FtTAoS            |
| 6:2 FtTPIAA<br>( <i>m/z</i> 593) | [ <sup>13</sup> C2]6:2 FtS | 593                             | 213                              | 152                             | 90                        | 10                      | negative | 6:2 FtTAoS            |
| 6:2 FtSiAoS<br>( <i>m/z</i> 602) | [ <sup>13</sup> C2]6:2 FtS | 602                             | 256                              | 206                             | 135                       | 40                      | negative | 6:2 FtTAoS            |
| <i>m/z</i> 618                   | [ <sup>13</sup> C2]6:2 FtS | 618                             | 206                              | 152                             | 30                        | 30                      | negative | 6:2 FtTAoS            |

313

314 **Table S4.** Standard PFASs used in the verification experiments for suspect-screening analysis of HR-ESI-MS accurate mass data.

| No | Standard | Exact      | Nominal    | Perfluoro | Conc. in            |    | Accurate mass ( <i>m/z</i> ) |                |          |                |          |                |
|----|----------|------------|------------|-----------|---------------------|----|------------------------------|----------------|----------|----------------|----------|----------------|
|    | library  | mass       | mass       | -chain    | mixture             |    | (HR-ESI-MS)                  |                |          |                |          |                |
|    | Name     | <i>m/z</i> | <i>m/z</i> |           | ( $\mu\text{g/L}$ ) | nM | Mix1                         | Error<br>(ppm) | Mix2     | Error<br>(ppm) | Mix3     | Error<br>(ppm) |
| 1  | PFBA     | 212.9787   | 213        | 4         | 18                  | 84 |                              |                |          |                |          |                |
| 2  | PFPeA    | 262.9754   | 263        | 5         | 18                  | 68 | 262.9762                     | 3.04           |          |                | 262.976  | 2.28           |
| 3  | PFHxA    | 312.9723   | 313        | 6         | 18                  | 57 | 312.973                      | 2.24           | 312.9732 | 2.88           | 312.973  | 2.24           |
| 4  | PFHpA    | 362.9691   | 363        | 7         | 18                  | 49 | 362.9698                     | 1.93           | 362.9698 | 1.93           | 362.9698 | 1.93           |
| 5  | PFOA     | 412.9659   | 413        | 8         | 18                  | 43 | 412.9667                     | 1.94           | 412.9667 | 1.94           | 412.9667 | 1.94           |
| 6  | PFNA     | 462.9627   | 463        | 9         | 18                  | 39 | 462.9635                     | 1.73           | 462.9635 | 1.73           | 462.9636 | 1.94           |
| 7  | PFDA     | 512.9595   | 513        | 10        | 18                  | 35 | 512.9603                     | 1.56           | 512.9603 | 1.56           | 512.9604 | 1.75           |
| 8  | PFuDA    | 562.9564   | 563        | 11        | 18                  | 32 | 562.9568                     | 0.71           | 562.9569 | 0.89           | 562.9569 | 0.89           |
| 9  | PFdDA    | 612.9532   | 613        | 12        | 18                  | 29 | 612.9536                     | 0.65           | 612.9536 | 0.65           | 612.9536 | 0.65           |
| 10 | PFtrDA   | 662.9500   | 663        | 13        | 18                  | 27 | 662.9503                     | 0.45           | 662.9504 | 0.60           | 662.9505 | 0.75           |
| 11 | PFtDA    | 712.9468   | 713        | 14        | 18                  | 25 | 712.9474                     | 0.84           | 712.9474 | 0.84           | 712.9475 | 0.98           |
| 12 | PFhDA    | 812.9405   | 813        | 16        | 18                  | 22 | 812.9415                     | 1.23           | 812.9415 | 1.23           | 812.9416 | 1.35           |
| 13 | PFoDA    | 912.9341   | 913        | 18        | 18                  | 20 | 912.9357                     | 1.75           | 912.9357 | 1.75           | 912.9357 | 1.75           |
| 14 | PFBS     | 298.9424   | 299        | 4         | 18                  | 60 | 298.9431                     | 2.34           | 298.9432 | 2.68           | 298.9432 | 2.68           |
| 15 | PFHxS    | 398.9361   | 399        | 6         | 18                  | 45 | 398.9369                     | 2.01           | 398.9369 | 2.01           | 398.9369 | 2.01           |



|    |            |          |     |    |    |    |          |      |          |       |          |      |
|----|------------|----------|-----|----|----|----|----------|------|----------|-------|----------|------|
| 16 | PFHpS      | 448.933  | 449 | 7  | 18 | 40 | 448.9338 | 1.78 | 448.9338 | 1.78  | 448.9338 | 1.78 |
| 17 | PFOS       | 498.9298 | 499 | 8  | 18 | 36 | 498.9304 | 1.20 | 498.9305 | 1.40  | 498.9305 | 1.40 |
| 18 | PFDS       | 598.9234 | 599 | 10 | 18 | 30 | 598.9236 | 0.33 | 598.9236 | 0.33  | 598.9237 | 0.50 |
| 19 | 4:2 FtS    | 326.9737 | 327 | 4  | 17 | 51 | 326.9744 | 2.14 | 326.9745 | 2.45  | 326.9746 | 2.75 |
| 20 | 6:2 FtS    | 426.9673 | 427 | 6  | 16 | 38 | 426.9682 | 2.11 | 426.9682 | 2.11  | 426.9682 | 2.11 |
| 21 | 8:2 FtS    | 526.9609 | 527 | 8  | 16 | 31 | 526.9616 | 1.33 | 526.9616 | 1.33  | 526.9617 | 1.52 |
| 22 | 6:2 FtTP   | 451.0038 | 451 | 6  | 17 | 38 | 451.0047 | 2.00 | 451.0047 | 2.00  | 451.0047 | 2.00 |
| 23 | 8:2 FtTP   | 550.9974 | 551 | 8  |    |    |          |      | 550.9954 | -3.63 | 550.9978 | 0.73 |
| 24 | 6:2 FtTAoS | 586.0392 | 586 | 6  | 17 | 28 | 586.0397 | 0.85 | 586.0396 | 0.68  | 586.0397 | 0.85 |
| 25 | 6:2 PAP    | 442.9717 | 443 | 6  | 17 | 37 | 442.9727 | 2.26 | 442.9727 | 2.26  | 442.9731 | 3.16 |
| 26 | 8:2 PAP    | 542.9655 | 543 | 8  | 17 | 31 | 542.966  | 0.92 | 542.9659 | 0.74  | 542.9658 | 0.55 |
| 27 | 6:2 diPAP  | 788.9745 | 789 | 6  | 17 | 21 | 788.9756 | 1.39 | 788.9757 | 1.52  | 788.9758 | 1.65 |
| 28 | 8:2 diPAP  | 988.962  | 989 | 8  | 16 | 17 | 988.9629 | 0.91 | 988.9629 | 0.91  | 988.9632 | 1.21 |
| 29 | 8:2FtCA    | 476.9784 | 477 | 8  | 17 | 35 | 476.9785 | 0.21 | 476.9792 | 1.68  |          |      |
| 30 | FOSA       | 497.9457 | 498 | 8  | 17 | 33 | 497.9464 | 1.41 | 497.9464 | 1.41  | 497.9465 | 1.61 |
| 31 | FOSAA      | 555.9512 | 556 | 8  | 17 | 30 | 555.9517 | 0.90 | 555.9517 | 0.90  | 555.9518 | 1.08 |
| 32 | MeFOSAA    | 569.9669 | 570 | 8  | 17 | 30 | 569.9671 | 0.35 | 569.9672 | 0.53  | 569.9672 | 0.53 |
| 33 | False      |          |     |    |    |    |          |      |          |       | 468.9791 | 1.28 |
|    | positive   |          |     |    |    |    |          |      |          |       |          |      |

Error: mass error (ppm); False positives were defined as masses that were not included in the 32 listed standard compounds, but were recognized by the automated matching analysis using the prediction library.

**Table S5.** Annotated fragments of HR-nanoESI-MS/MS analysis based on in-silico fragment analysis using the software, ACD/MS fragmenter 2015 (Advanced Chemical Development, Toronto, ON, Canada) or the reference spectrum of 6:2 FtTP. The MS/MS spectra and the proposed fragment structures are shown in Figure S2.

|                 | Theoretical<br>exact mass | Observed<br>accurate mass | Error |       | Proposed<br>formula |
|-----------------|---------------------------|---------------------------|-------|-------|---------------------|
|                 |                           |                           | (ppm) | (mDa) |                     |
| <i>m/z</i> 451  |                           |                           |       |       |                     |
| a               | 378.9832                  | 378.9775                  | 15.0  | 5.7   | C8H4F13S-           |
| b               | 358.9769                  | 358.9767                  | 0.6   | 0.2   | C8H3F12S-           |
| c               | 338.9707                  | 338.9709                  | 0.6   | 0.2   | C8H2F11S-           |
| d               | 318.9645                  | 318.9612                  | 10.4  | 3.3   | C8HF10S-            |
| e               | 298.9582                  | 298.9556                  | 8.7   | 2.6   | C8F9S-              |
| f               | 292.9830                  | 292.9816                  | 4.8   | 1.4   | C7F11-              |
| g               | 216.9894                  | 216.9862                  | 14.8  | 3.2   | C7F7-               |
| h               | 105.0016                  | 104.9984                  | 30.5  | 3.2   | C3H5O2S-            |
| <i>m/z</i> 522* |                           |                           |       |       |                     |
| a               | 378.9832                  | 378.9694                  | 36.4  | 13.8  | C8H4F13S-           |
| b               | 142.0510                  | 142.0403                  | 75.3  | 10.7  | C6H8NO3-            |
| c               | 98.0611                   | 98.0541                   | 71.4  | 7.0   | C5H8NO-             |
| <i>m/z</i> 523  |                           |                           |       |       |                     |
| a               | 378.9832                  | 378.9775                  | 15.0  | 5.7   | C8H4F13S-           |
| b               | 318.9645                  | 318.9612                  | 10.3  | 3.3   | C8HF10S-            |
| c               | 298.9583                  | 298.9556                  | 8.7   | 2.6   | C8F9S-              |
| d               | 292.9830                  | 292.9816                  | 4.7   | 1.4   | C7F11-              |
| e               | 216.9894                  | 216.9862                  | 14.6  | 3.2   | C7F7-               |
| f               | 143.0350                  | 143.0316                  | 23.6  | 3.4   | C6H7O4-             |
| g               | 99.0452                   | 99.0429                   | 22.7  | 2.3   | C5H7O2-             |
| <i>m/z</i> 593  |                           |                           |       |       |                     |
| a               | 378.9832                  | 378.9779                  | 14.0  | 5.3   | C8H4F13S-           |
| b               | 213.0881                  | 213.0850                  | 14.5  | 3.1   | C9H13N2O4-          |
| c               | 195.0775                  | 195.0743                  | 16.4  | 3.2   | C9H11N2O3-          |
| d               | 124.0404                  | 124.0390                  | 11.3  | 1.4   | C6H6NO2-            |
| <i>m/z</i> 602  |                           |                           |       |       |                     |
| a               | 256.0319                  | 256.0286                  | 12.9  | 3.3   | C7H14NO5S2-         |
| b               | 206.0493                  | 206.0477                  | 7.8   | 1.6   | C7H12NO4S-          |
| c               | 152.0387                  | 152.0341                  | 30.3  | 4.6   | C4H10NO3S-          |
| <i>m/z</i> 467  |                           |                           |       |       |                     |
| a               | 356.9612                  | 356.9602                  | 2.8   | 1     | C8HF12S-            |
| b               | 334.9593                  | 334.9539                  | 16.1  | 5.4   | C8HF10OS-           |
| c               | 314.9532                  | 314.9485                  | 14.9  | 4.7   | C8F9OS-             |

|   |          |          |     |     |          |
|---|----------|----------|-----|-----|----------|
| d | 266.9862 | 266.9836 | 9.7 | 2.6 | C8F9-    |
| e | 120.9929 | 120.9935 | 5.0 | 0.6 | C3H5O3S- |

\* Standard reference of 6:2FtTP ( $m/z$  451) showed the same fragment with  $m/z$  at 378.9694.

## References

- Place, B. J.; Field, J. A., Identification of novel fluorochemicals in aqueous film-forming foams used by the US military. *Environ. Sci. Technol.* **2012**, *46*, (13), 7120-7, DOI: 10.1021/es301465n.
- Houtz, E. F.; Higgins, C. P.; Field, J. A.; Sedlak, D. L., Persistence of perfluoroalkyl acid precursors in AFFF-impacted groundwater and soil. *Environ. Sci. Technol.* **2013**, *47*, (15), 8187-8195, DOI: 10.1021/es4018877.
- Harding-Marjanovic, K. C.; Houtz, E. F.; Yi, S.; Field, J. A.; Sedlak, D. L.; Alvarez-Cohen, L., Aerobic biotransformation of fluorotelomer thioether amido sulfonate (Lodyne) in AFFF-amended microcosms. *Environ. Sci. Technol.* **2015**, *49*, (13), 7666-74, DOI: 10.1021/acs.est.5b01219.
- Jasper, J. T.; Jones, Z. L.; Sharp, J. O.; Sedlak, D. L., Nitrate Removal in Shallow, Open-Water Treatment Wetlands. *Environ. Sci. Technol.* **2014**, *48*, (19), 11512-11520, DOI: 10.1021/es502785t.
- Association., A. P. H., *Standard Methods for the Examination of Water and Wastewater*, 19th ed. American Public Health Association, American Water Works Association, Water Environment Foundation: Washington, DC: 1995.
- Glantz, S. A., *Primer of biostatistics*. 5th ed. McGraw-Hill: New York, NY, 2001.
- Gao, J.; Ellis, L. B. M.; Wackett, L. P., The University of Minnesota Biocatalysis/Biodegradation Database: improving public access. *Nucleic Acids Res.* **2010**, *38*, (suppl 1), D488-D491, DOI: 10.1093/nar/gkp771.
- Allred, B. M.; Lang, J. R.; Barlaz, M. A.; Field, J. A., Physical and Biological Release of Poly- and Perfluoroalkyl Substances (PFASs) from Municipal Solid Waste in Anaerobic Model Landfill Reactors. *Environ. Sci. Technol.* **2015**, *49*, (13), 7648-7656, DOI: 10.1021/acs.est.5b01040.
- Kim, M. H.; Wang, N.; Chu, K. H., 6:2 Fluorotelomer alcohol (6:2 FTOH) biodegradation by multiple microbial species under different physiological conditions. *Appl. Microbiol. Biotechnol.* **2013**, (5), 1831-1840, DOI: 10.1007/s00253-013-5131-3.
- Zhang, S.; Szostek, B.; McCausland, P. K.; Wolstenholme, B. W.; Lu, X.; Wang, N.; Buck, R. C., 6: 2 and 8: 2 fluorotelomer alcohol anaerobic biotransformation in digester sludge from a WWTP under methanogenic conditions. *Environ. Sci. Technol.* **2013**, *47*, (9), 4227-4235, DOI: 10.1021/es4000824.
- Kim, M. H.; Wang, N.; Chu, K. H., 6: 2 Fluorotelomer alcohol (6: 2 FTOH) biodegradation by multiple microbial species under different physiological conditions. *Appl. Microbiol. Biotechnol.* **2014**, *98*, (4), 1831-1840, DOI: 10.1007/s00253-013-5131-3.
- Tseng, N.; Wang, N.; Szostek, B.; Mahendra, S., Biotransformation of 6: 2 fluorotelomer alcohol (6: 2 FTOH) by a wood-rotting fungus. *Environ. Sci. Technol.* **2014**, *48*, (7), 4012-4020, DOI: 10.1021/es4057483.
- Wang, N.; Liu, J.; Buck, R. C.; Korzeniowski, S. H.; Wolstenholme, B. W.; Folsom, P. W.; Sulecki, L. M., 6: 2 Fluorotelomer sulfonate aerobic biotransformation in activated sludge of

waste water treatment plants. *Chemosphere* **2011**, 82, (6), 853-858, DOI:  
10.1016/j.chemosphere.2010.11.003.

14. Weiner, B.; Yeung, L. W.; Marchington, E. B.; D'Agostino, L. A.; Mabury, S. A.,  
Organic fluorine content in aqueous film forming foams (AFFFs) and biodegradation of the foam  
component 6: 2 fluorotelomermercaptoalkylamido sulfonate (6: 2 FTSAS). *Environ. Chem.* **2013**,  
10, (6), 486-493, DOI: 10.1071/EN13128.

15. Barzen-Hanson, K. A.; Roberts, S. C.; Choyke, S.; Oetjen, K.; McAlees, A.; Riddell, N.;  
McCrindle, R.; Ferguson, P. L.; Higgins, C. P.; Field, J. A., Discovery of 40 classes of per- and  
polyfluoroalkyl substances in historical aqueous film-forming foams (AFFFs) and AFFF-  
impacted groundwater. *Environ. Sci. Technol.* **2017**, 51, (4), 2047-2057, DOI:  
10.1021/acs.est.6b05843.

16. Schymanski, E. L.; Jeon, J.; Gulde, R.; Fenner, K.; Ruff, M.; Singer, H. P.; Hollender, J.,  
Identifying small molecules via high resolution mass spectrometry: communicating confidence.  
*Environ. Sci. Technol.* **2014**, 48, (4), 2097-2098, DOI: 10.1021/es5002105.
